# Supplementary material for: Distinct cardiovascular phenotypes are associated with prognosis in systemic sclerosis: a cardiovascular magnetic resonance study
Source: PubMed Central journal article supplement — Eur Heart J Cardiovasc Imaging. 2022 Jul 1;24(4):463–71. doi: 10.1093/ehjci/jeac120 (PMC10029850; doi:10.1093/ehjci/jeac120), 2022-07-01
Supplement: jeac120_supplementary_data.pdf [file jeac120_supplementary_data.pdf]

## Supplementary Material

### **Distinct cardiovascular phenotypes are associated with prognosis in systemic sclerosis: a cardiovascular magnetic resonance study.**

Daniel S. Knight, MBBS, MD(Res), Nina Karia, MBBS, Alice R. Cole, MBChB, Rory H. Maclean, BM BCh, BA, James T. Brown, MB BChir, Ambra Masi, MD, Rishi K. Patel, MBBS, Yousuf Razvi, MBChB, Liza Chacko, MBBS, Lucia Venneri, MD, PhD, Tushar Kotecha, MBChB, PhD, Ana Martinez-Naharro, MD, PhD, Peter Kellman, PhD, Ann M. Scott-Russell, MBBS BMedSci, Benjamin E. Schreiber, MD, MA, Voon H. Ong, PhD, Christopher P. Denton, PhD, Marianna Fontana, MD, PhD, J. Gerry Coghlan, MD,\* Vivek Muthurangu, MD\*

\* These authors contributed equally to the manuscript and should be considered joint last authors.

## Supplementary Material

|                                     |         |
|-------------------------------------|---------|
| <b>Supplementary Table 1</b> .....  | Page 3  |
| <b>Supplementary Table 2</b> .....  | Page 5  |
| <b>Supplementary Table 3</b> .....  | Page 6  |
| <b>Supplementary Table 4</b> .....  | Page 7  |
| <b>Supplementary Table 5</b> .....  | Page 9  |
| <b>Supplementary Table 6</b> .....  | Page 11 |
| <b>Supplementary Table 7</b> .....  | Page 12 |
| <b>Supplementary Table 8</b> .....  | Page 14 |
| <b>Supplementary Table 9</b> .....  | Page 16 |
| <b>Supplementary Table 10</b> ..... | Page 17 |
| <b>Supplementary Table 11</b> ..... | Page 18 |
| <b>Supplementary Table 12</b> ..... | Page 19 |
| <b>Supplementary Figure 1</b> ..... | Page 21 |
| <b>Supplementary Figure 2</b> ..... | Page 22 |

**Supplementary Table 1:** Clinical details of SSc patient cohort.

|                                                 | <b>SSc patients (n = 260)</b> |
|-------------------------------------------------|-------------------------------|
| <b>Demographics and co-morbidities</b>          |                               |
| Female, n (%)                                   | 207 (80)                      |
| Age, years                                      | 59 (17-85)                    |
| BSA (m <sup>2</sup> )                           | 1.7 (1.3-2.3)                 |
| Interstitial lung disease (any severity), n (%) | 117 (45)                      |
| Emphysema (any severity), n (%)                 | 32 (12)                       |
| Hypertension, n (%)                             | 77 (30)                       |
| Diabetes mellitus, n (%)                        | 20 (8)                        |
| Ischaemic heart disease, n (%)                  | 24 (9)                        |
| Atrial fibrillation, n (%)                      | 24 (9)                        |
| <b>Immunomodulatory therapy</b>                 |                               |
| Mycophenolate mofetil, n (%)                    | 105 (40)                      |
| Glucocorticoids, n (%)                          | 102 (39)                      |
| Azathioprine, n (%)                             | 13 (5)                        |
| Hydroxychloroquine, n (%)                       | 63 (24)                       |
| Leflunomide, n (%)                              | 2 (1)                         |
| Tacrolimus, n (%)                               | 4 (2)                         |
| Rituximab, n (%)                                | 9 (3)                         |
| Cyclophosphamide, n (%)                         | 33 (13)                       |
| Nintedanib, n (%)                               | 1 (0.5)                       |
| Tocilizumab, n (%)                              | 5 (2)                         |
| Adalimumab, n (%)                               | 1 (0.5)                       |
| Golimumab, n (%)                                | 1 (0.5)                       |
| <b>SSc details</b>                              |                               |
| Limited/diffuse/sine SSc, n (%)                 | 167/90/3 (64/35/1)            |
| Overlap syndromes, n (%)                        | 79 (30)                       |
| - Myositis, n (%)                               | 44 (17)                       |
| - Inflammatory arthritis, n (%)                 | 23 (9)                        |
| - Sjögren's syndrome, n (%)                     | 18 (7)                        |
| - SLE, n (%)                                    | 13 (5)                        |
| Disease duration (diagnosis to CMR), years      | 9 (0-47)                      |
| Disease severity score                          | 2 (1-4)                       |
| <b>Autoantibody subset, %</b>                   |                               |
| Anticentromere                                  | 88 (34)                       |
| Anti-topoisomerase I                            | 56 (22)                       |
| Anti-RNA polymerase                             | 21 (8)                        |
| Anti-U3 RNP                                     | 18 (7)                        |
| Anti-PM/Scl                                     | 11 (4)                        |
| Other*                                          | 25 (10)                       |
| ANA+ENA-                                        | 87 (33)                       |
| ANA-                                            | 13 (5)                        |

| <b>SSc-associated PH</b>                                 |                       |
|----------------------------------------------------------|-----------------------|
| Patients diagnosed with SSc-PH, n (%)                    | 112 (43)              |
| Group 1/2/3/4 PH, n (% of PH diagnoses)                  | 78/24/8/2 (70/21/7/2) |
| Incident/Prevalent PH diagnosis, n (%)                   | 26/54 (32.5/67.5)     |
| <b>Targeted therapies for Group 1 PH patients (n=78)</b> |                       |
| PDE5I, n (% of Group 1 PH patients)                      | 54                    |
| ERA, n (% of Group 1 PH patients)                        | 38                    |
| SGCS, n (% of Group 1 PH patients)                       | 2                     |
| Prostanoids (IV/oral), n (% of Group 1 PH patients)      | 4 (5) / 2 (3)         |

ANA, antinuclear antibody; BSA, body surface area; CMR, cardiovascular magnetic resonance; ENA, anti-extractable nuclear antigen; ERA = endothelin receptor antagonist; IV = intravenous; m, metres; PDE5I = phosphodiesterase type 5 inhibitors; PH, pulmonary hypertension; SGCS = soluble guanylate cyclase stimulators; SLE, systemic lupus erythematosus; SSc, scleroderma/systemic sclerosis.

**Supplementary Table 2:** CMR indications.

| <b>Tissue characterisation</b> | <b>Known / suspected PH</b> | <b>Volumes / function / mass</b> | <b>Myocardial ischaemia</b> | <b>Number</b> |
|--------------------------------|-----------------------------|----------------------------------|-----------------------------|---------------|
| X                              |                             |                                  |                             | 117           |
|                                | X                           |                                  |                             | 80            |
|                                |                             | X                                |                             | 9             |
|                                |                             |                                  | X                           | 3             |
| X                              | X                           |                                  |                             | 24            |
| X                              |                             | X                                |                             | 9             |
| X                              |                             |                                  | X                           | 12            |
|                                | X                           | X                                |                             | 2             |
| X                              | X                           |                                  | X                           | 2             |
| X                              |                             | X                                | X                           | 1             |
| X                              | X                           | X                                | X                           | 1             |

PH, pulmonary hypertension.

**Supplementary Table 3:** CMR parameters of SSc patient cohort.

| <b>CMR metrics</b>                   | <b>SSc patients (n = 260)</b> |
|--------------------------------------|-------------------------------|
| RVEDVi (mL/m <sup>2</sup> )          | 73 (30-184)                   |
| RVESVi (mL/m <sup>2</sup> )          | 28 (10-119)                   |
| RVSVi (mL/m <sup>2</sup> )           | 43 (18-77)                    |
| RVEF (%)                             | 61 (19-82)                    |
| RVMi (g/m <sup>2</sup> )             | 28 (12-76)                    |
| LVEDVi (mL/m <sup>2</sup> )          | 67 (27-131)                   |
| LVESVi (mL/m <sup>2</sup> )          | 22 (6-83)                     |
| LVSVi (mL/m <sup>2</sup> )           | 44 (14-83)                    |
| LVEF (%)                             | 68 (15-87)                    |
| LVMi (g/m <sup>2</sup> )             | 63 (29-140)                   |
| LAi area (cm/m <sup>2</sup> )        | 13 (6-29)                     |
| RAi area (cm/m <sup>2</sup> )        | 12 (4-30)                     |
| T1 (ms)                              | 1071 (932-1290)               |
| T2 (ms)                              | 50 (40-59)                    |
| Major insertion point LGE, n (%)     | 44 (17)                       |
| Major non-insertion point LGE, n (%) | 47 (18)                       |
| Pericardial effusion, n (%)          | 71 (27)                       |

Values are median (range) or n (%). BSA, body surface area; cm, centimetres; CMR, cardiovascular magnetic resonance; EDV, end-diastolic volume; EF, ejection fraction; ESV, end-systolic volume; g, grammes; I, indexed for body-surface area; LA, left atrial; LV, left ventricular; M, mass; m, metres; mL, millilitres; ms, milliseconds; RA, right atrial; RV, right ventricular; SV, stroke volume.

**Supplementary Table 4:** CMR and clinical data for SSc patients with and without PH.

| Variable                                                       | SSc without PH (n=148) | SSc-associated PH (n=112) | P-value |
|----------------------------------------------------------------|------------------------|---------------------------|---------|
| <b>CMR metrics</b>                                             |                        |                           |         |
| RVEDVi (mL/m <sup>2</sup> )                                    | 70 (35-126)            | 80 (30-184)               | <0.001  |
| RVESVi (mL/m <sup>2</sup> )                                    | 25 (10-69)             | 33 (10-119)               | <0.001  |
| RVSVi (mL/m <sup>2</sup> )                                     | 44 (19-77)             | 43 (18-77)                | 0.63    |
| RVEF (%)                                                       | 63 (26-82)             | 56 (19-82)                | <0.001  |
| RV MVR (g/mL)                                                  | 0.4 (0.2-0.9)          | 0.4 (0.2-0.8)             | <0.001  |
| RAi area (cm/m <sup>2</sup> )                                  | 11 (4-30)              | 13 (6-22)                 | <0.001  |
| LVEDVi (mL/m <sup>2</sup> )                                    | 69 (39-123)            | 65 (27-131)               | 0.037   |
| LVESVi (mL/m <sup>2</sup> )                                    | 23 (9-83)              | 20 (6-82)                 | 0.057   |
| LVSVi (mL/m <sup>2</sup> )                                     | 45 (14-83)             | 43 (18-71)                | 0.030   |
| LVEF (%)                                                       | 67 (15-87)             | 68 (28-86)                | 0.42    |
| LV MVR (g/mL)                                                  | 0.9 (0.4-2.4)          | 1.0 (0.6-2.2)             | 0.013   |
| LAi area (cm/m <sup>2</sup> )                                  | 13 (7-29)              | 13 (6-21)                 | 0.93    |
| COi (L/min/m <sup>2</sup> )                                    | 3.2 (1.0-5.9)          | 3.0 (1.4-7.4)             | 0.055   |
| T1 (ms)                                                        | 1063 (932-1195)        | 1083 (983-1290)           | <0.001  |
| T2 (ms)                                                        | 49 (41-59)             | 51 (40-59)                | 0.0032  |
| ECV (%)                                                        | 32 (23-43)             | 32 (25-48)                | 0.0017  |
| Major insertion point LGE (%)                                  | 2                      | 38                        | <0.001  |
| Major non-insertion point LGE (%)                              | 22                     | 14                        | 0.10    |
| Pericardial effusion (%)                                       | 20                     | 36                        | 0.0048  |
| Heart rate (bpm)                                               | 74 (46-112)            | 75 (48-113)               | 0.35    |
| <b>Haemodynamic data (from RHC within 1 year of CMR study)</b> |                        |                           |         |
| mPAP (mmHg)                                                    | 18 (11-24)             | 31 (19-69)                | <0.001  |
| RAP (mmHg)                                                     | 5 (1-15)               | 8 (0-30)                  | <0.001  |
| PCWP (mmHg)                                                    | 10 (4-16)              | 12 (5-22)                 | <0.001  |
| <b>Patient demographics</b>                                    |                        |                           |         |
| Height (m)                                                     | 1.6 (1.5-1.9)          | 1.6 (1.4-1.9)             | 0.021   |
| Weight (kg)                                                    | 64 (39-115)            | 65 (39-123)               | 0.998   |
| Age (years)                                                    | 58 (17-83)             | 64 (21-85)                | 0.056   |
| Sex (female, %)                                                | 78                     | 83                        | 0.44    |
| <b>SSc details</b>                                             |                        |                           |         |
| Limited (%)                                                    | 56                     | 73                        | 0.0041  |
| Diffuse (%)                                                    | 43                     | 24                        | 0.0023  |
| Overlap syndrome (%)                                           | 33                     | 26                        | 0.28    |
| Inflammatory arthritis (%)                                     | 9                      | 8                         | 0.83    |
| Sjögren's syndrome (%)                                         | 6                      | 8                         | 0.62    |
| SLE (%)                                                        | 6                      | 3                         | 0.40    |
| Myositis (%)                                                   | 20                     | 12                        | 0.13    |
| Disease duration (years)                                       | 6 (0-47)               | 12 (0-42)                 | 0.011   |
| Disease severity score                                         | 2 (1-4)                | 3 (1-4)                   | 0.0064  |

| <b>Autoantibody subset, %</b> |    |    |                  |
|-------------------------------|----|----|------------------|
| Anticentromere                | 24 | 46 | <b>&lt;0.001</b> |
| Anti-topoisomerase I          | 28 | 13 | <b>0.0059</b>    |
| Anti-RNA polymerase           | 10 | 5  | 0.18             |
| Anti-U3 RNP                   | 8  | 5  | 0.46             |
| Anti-PM/Scl                   | 6  | 0  | <b>0.026</b>     |
| Other*                        | 8  | 11 | 0.40             |
| ANA+ENA-                      | 29 | 39 | 0.11             |
| ANA-                          | 7  | 3  | 0.16             |

Values are median (range) or n (%). Bold denotes statistically significant values ( $P < 0.05$ ). ANA, antinuclear antibody; bpm, beats per minute; cm, centimetres; CMR, cardiovascular magnetic resonance; CO, cardiac output; ECV, extracellular volume; EDV, end-diastolic volume; EF, ejection fraction; ENA, anti-extractable nuclear antigen; ESV, end-systolic volume; g, grammes; I, indexed for body-surface area; kg, kilogrammes; L, litre; LA, left atrial; LGE, late gadolinium enhancement; LV, left ventricular; m, metres; min, minute; mL, millilitres; mmHg, millimetre of mercury; mPAP, mean pulmonary arterial pressure; ms, milliseconds; MVR, mass-to-volume ratio; PCWP, pulmonary capillary wedge pressure; PH, pulmonary hypertension; RA, right atrial; RAP, right atrial pressure; RHC, right heart catheter; RV, right ventricular; SLE, systemic lupus erythematosus; SSc, scleroderma/systemic sclerosis; SV, stroke volume.



**Supplementary Table 5:** CMR and clinical data for SSc patients with and without overlap syndromes.

| Variable                                                       | SSc without overlap syndrome (n=181) | SSc with overlap syndrome (n=79) | P-value          |
|----------------------------------------------------------------|--------------------------------------|----------------------------------|------------------|
| <b>CMR metrics</b>                                             |                                      |                                  |                  |
| RVEDVi (mL/m <sup>2</sup> )                                    | 72 (30-142)                          | 74 (37-184)                      | 0.72             |
| RVESVi (mL/m <sup>2</sup> )                                    | 28 (10-101)                          | 28 (10-119)                      | 0.66             |
| RVSVi (mL/m <sup>2</sup> )                                     | 43 (18-76)                           | 43 (19-77)                       | 0.58             |
| RVEF (%)                                                       | 61 (19-82)                           | 61 (26-82)                       | 0.96             |
| RV MVR (g/mL)                                                  | 0.4 (0.2-0.8)                        | 0.4 (0.2-0.9)                    | 0.80             |
| RAi area (cm/m <sup>2</sup> )                                  | 12 (4-22)                            | 12 (6-30)                        | 0.67             |
| LVEDVi (mL/m <sup>2</sup> )                                    | 67 (27-122)                          | 67 (44-131)                      | 0.27             |
| LVESVi (mL/m <sup>2</sup> )                                    | 22 (6-83)                            | 22 (7-83)                        | 0.31             |
| LVSVi (mL/m <sup>2</sup> )                                     | 44 (18-79)                           | 44 (14-83)                       | 0.52             |
| LVEF (%)                                                       | 67 (28-87)                           | 68 (15-86)                       | 0.65             |
| LV MVR (g/mL)                                                  | 0.9 (0.4-2.4)                        | 1.0 (0.4-1.6)                    | 0.78             |
| LAi area (cm/m <sup>2</sup> )                                  | 13 (6-29)                            | 13 (7-24)                        | 0.55             |
| COi (L/min/m <sup>2</sup> )                                    | 3.1 (1.4-7.4)                        | 3.4 (1.0-5.5)                    | <b>0.028</b>     |
| T1 (ms)                                                        | 1071 (932-1266)                      | 1073 (946-1290)                  | 0.43             |
| T2 (ms)                                                        | 50 (40-59)                           | 50 (41-57)                       | 0.22             |
| ECV (%)                                                        | 32 (25-48)                           | 32 (23-47)                       | 0.56             |
| Major insertion point LGE (%)                                  | 18                                   | 17                               | 1.00             |
| Major non-insertion point LGE (%)                              | 20                                   | 17                               | 0.73             |
| Pericardial effusion (%)                                       | 29                                   | 22                               | 0.29             |
| Heart rate (bpm)                                               | 74 (46-112)                          | 76 (48-113)                      | 0.16             |
| <b>Haemodynamic data (from RHC within 1 year of CMR study)</b> |                                      |                                  |                  |
| PH (%)                                                         | 45                                   | 37                               | 0.28             |
| mPAP (mmHg)                                                    | 25 (11-69)                           | 23 (12-52)                       | 0.23             |
| RAP (mmHg)                                                     | 6 (0-25)                             | 6 (2-30)                         | 0.59             |
| PCWP (mmHg)                                                    | 10 (4-22)                            | 12 (4-18)                        | <b>0.050</b>     |
| <b>Patient demographics</b>                                    |                                      |                                  |                  |
| Height (m)                                                     | 1.6 (1.4-1.9)                        | 1.6 (1.5-1.9)                    | 0.78             |
| Weight (kg)                                                    | 64 (39-123)                          | 65 (40-115)                      | 0.37             |
| Age (years)                                                    | 62 (23-85)                           | 55 (17-82)                       | <b>&lt;0.001</b> |
| Sex (female, %)                                                | 77                                   | 88                               | <b>0.045</b>     |
| <b>SSc details</b>                                             |                                      |                                  |                  |
| Limited (%)                                                    | 67                                   | 56                               | 0.12             |
| Diffuse (%)                                                    | 31                                   | 44                               | <b>0.047</b>     |
| Overlap syndrome (%)                                           | -                                    | 100                              | -                |
| Inflammatory arthritis (%)                                     | -                                    | 29                               | -                |
| Sjögren's syndrome (%)                                         | -                                    | 22                               | -                |

|                               |          |          |                  |
|-------------------------------|----------|----------|------------------|
| SLE (%)                       | -        | 16       | -                |
| Myositis (%)                  | -        | 55       | -                |
| Disease duration (years)      | 9 (0-42) | 8 (0-47) | 0.81             |
| Disease severity score        | 2 (1-4)  | 2 (1-4)  | 0.17             |
| <b>Autoantibody subset, %</b> |          |          |                  |
| Anticentromere                | 39       | 23       | <b>0.015</b>     |
| Anti-topoisomerase I          | 21       | 23       | 0.74             |
| Anti-RNA polymerase           | 10       | 2        | <b>0.044</b>     |
| Anti-U3 RNP                   | 5        | 10       | 0.19             |
| Anti-PM/Scl                   | 1        | 11       | <b>&lt;0.001</b> |
| Other*                        | 5        | 20       | <b>&lt;0.001</b> |
| ANA+ENA-                      | 36       | 26       | 0.15             |
| ANA-                          | 6        | 6        | 1.00             |

Values are median (range) or n (%). Bold denotes statistically significant values ( $P < 0.05$ ). ANA, antinuclear antibody; bpm, beats per minute; cm, centimetres; CMR, cardiovascular magnetic resonance; CO, cardiac output; ECV, extracellular volume; EDV, end-diastolic volume; EF, ejection fraction; ENA, anti-extractable nuclear antigen; ESV, end-systolic volume; g, grammes; I, indexed for body-surface area; kg, kilogrammes; L, litre; LA, left atrial; LGE, late gadolinium enhancement; LV, left ventricular; m, metres; min, minute; mL, millilitres; mmHg, millimetre of mercury; mPAP, mean pulmonary arterial pressure; ms, milliseconds; MVR, mass-to-volume ratio; PCWP, pulmonary capillary wedge pressure; PH, pulmonary hypertension; RA, right atrial; RAP, right atrial pressure; RHC, right heart catheter; RV, right ventricular; SLE, systemic lupus erythematosus; SSc, scleroderma/systemic sclerosis; SV, stroke volume.

**Supplementary Table 6:** Missingness of CMR variables.

| <b>Variable</b> | <b>Missingness, n (%)</b> |
|-----------------|---------------------------|
| RVEDVi          | 3 (1.2)                   |
| RVESVi          | 3 (1.2)                   |
| RVSVi           | 3 (1.2)                   |
| RVEF            | 2 (0.8)                   |
| RV MVR          | 4 (1.5)                   |
| RAi area        | 5 (1.9)                   |
| LVEDVi          | 3 (1.2)                   |
| LVESVi          | 3 (1.2)                   |
| LVSVi           | 3 (1.2)                   |
| LVEF            | 2 (0.8)                   |
| LV MVR          | 2 (0.8)                   |
| LAi area        | 4 (1.5)                   |
| T1              | 2 (0.8)                   |
| T2              | 6 (2.3)                   |

EDV, end-diastolic volume; EF, ejection fraction; ESV, end-systolic volume; I, indexed for body-surface area; LA, left atrial; LV, left ventricular; MVR, mass-to-volume ratio; RA, right atrial; RV, right ventricular; SV, stroke volume.

**Supplementary Table 7:** Details of CMR indications and metrics according to CMR phenotype (post hoc *P*-values detailed in supplementary table 8).

| Variable                      | NF-AC<br>(n=128) | BVF<br>(n= 14)   | RVF<br>(n= 27)  | NF-LC<br>(n= 40) | NF-SC<br>(n= 51) | <i>P</i> -<br>value |
|-------------------------------|------------------|------------------|-----------------|------------------|------------------|---------------------|
| <b>CMR indication</b>         |                  |                  |                 |                  |                  |                     |
| Myocardial ischaemia (%)      | 8                | 14               | 3               | 5                | 5                | 0.70                |
| Known / suspected PH (%)      | 42               | 0                | 62              | 42               | 41               | <b>0.0017</b>       |
| Tissue characterisation (%)   | 71               | 100              | 25              | 60               | 56               | <b>&lt;0.001</b>    |
| Volumes / function / mass (%) | 7                | 7                | 14              | 7                | 9                | 0.6834              |
| <b>CMR metric</b>             |                  |                  |                 |                  |                  |                     |
| RVEDVi (mL/m <sup>2</sup> )   | 70 (51-94)       | 105 (58-184)     | 92 (63-142)     | 92 (70-131)      | 58 (30-85)       | <b>&lt;0.001</b>    |
| RVESVi (mL/m <sup>2</sup> )   | 25 (11-59)       | 62 (35-119)      | 64 (31-101)     | 34 (14-67)       | 22 (10-47)       | <b>&lt;0.001</b>    |
| RVSVi (mL/m <sup>2</sup> )    | 44 (32-59)       | 40 (19-65)       | 38 (18-61)      | 58 (45-77)       | 35 (21-45)       | <b>&lt;0.001</b>    |
| RVEF (%)                      | 64 (35-82)       | 37 (26-52)       | 39 (19-57)      | 63 (47-82)       | 62 (45-77)       | <b>&lt;0.001</b>    |
| RV MVR (g/mL)                 | 0.4 (0.2-0.7)    | 0.3 (0.2-0.5)    | 0.5 (0.2-0.8)   | 0.3 (0.2-0.6)    | 0.4 (0.2-0.9)    | <b>&lt;0.001</b>    |
| RAi area (cm/m <sup>2</sup> ) | 12 (5-18)        | 12 (9-17)        | 15 (10-22)      | 14 (11-30)       | 10 (4-16)        | <b>&lt;0.001</b>    |
| LVEDVi (mL/m <sup>2</sup> )   | 67 (49-99)       | 103 (93-131)     | 50 (36-87)      | 83 (61-123)      | 52 (27-70)       | <b>&lt;0.001</b>    |
| LVESVi (mL/m <sup>2</sup> )   | 22 (7-58)        | 66 (48-83)       | 20 (6-44)       | 24 (11-46)       | 16 (6-29)        | <b>&lt;0.001</b>    |
| LVSVi (mL/m <sup>2</sup> )    | 45 (34-58)       | 40 (14-55)       | 33 (18-58)      | 57 (45-83)       | 37 (21-50)       | <b>&lt;0.001</b>    |
| LVEF (%)                      | 68 (40-86)       | 37 (15-53)       | 59 (32-86)      | 71 (53-87)       | 68 (57-83)       | <b>&lt;0.001</b>    |
| LV MVR (g/mL)                 | 0.9 (0.4-1.6)    | 0.8 (0.4-1.2)    | 1.0 (0.7-1.8)   | 0.9 (0.6-1.4)    | 1.1 (0.7-2.4)    | <b>&lt;0.001</b>    |
| LAi area (cm/m <sup>2</sup> ) | 14 (7-29)        | 13 (10-18)       | 11 (7-20)       | 15 (12-24)       | 11 (6-18)        | <b>&lt;0.001</b>    |
| COi (L/min/m <sup>2</sup> )   | 3.1 (2.1-4.9)    | 3.2 (1.0-4.2)    | 2.4 (1.4-5.5)   | 3.8 (2.7-7.4)    | 3.0 (1.7-4.1)    | <b>&lt;0.001</b>    |
| T1 (ms)                       | 1066 (946-1180)  | 1087 (1008-1127) | 1111 (983-1290) | 1089 (990-1202)  | 1050 (932-1195)  | <b>&lt;0.001</b>    |

|                                   |             |             |             |             |             |                  |
|-----------------------------------|-------------|-------------|-------------|-------------|-------------|------------------|
| T2 (ms)                           | 50 (44-59)  | 48 (40-52)  | 52 (46-59)  | 53 (45-58)  | 48 (41-59)  | <b>&lt;0.001</b> |
| ECV (%)                           | 32 (23-43)  | 30 (25-38)  | 34 (28-47)  | 34 (25-48)  | 29 (25-40)  | <b>&lt;0.001</b> |
| Major insertion point LGE (%)     | 9           | 15          | 79          | 10          | 15          | <b>&lt;0.001</b> |
| Major non-insertion point LGE (%) | 17          | 69          | 8           | 18          | 15          | <b>&lt;0.001</b> |
| Pericardial effusion (%)          | 18          | 21          | 59          | 42          | 21          | <b>&lt;0.001</b> |
| Heart rate (bpm)                  | 70 (46-100) | 75 (53-113) | 79 (49-109) | 66 (48-103) | 82 (50-112) | <b>&lt;0.001</b> |

Values are median (range) or n (%). Bold denotes statistically significant values ( $P < 0.05$ ). bpm, beats per minute; cm, centimetres; CMR, cardiovascular magnetic resonance; CO, cardiac output; ECV, extracellular volume; EDV, end-diastolic volume; EF, ejection fraction; ESV, end-systolic volume; g, grammes; i, indexed for body-surface area; L, litre; LA, left atrial; LGE, late gadolinium enhancement; LV, left ventricular; m, metres; min, minute; mL, millilitres; ms, milliseconds; MVR, mass-to-volume ratio; RA, right atrial; RV, right ventricular; SV, stroke volume.

**Supplementary Table 8:** Post hoc *P*-values for details of CMR metrics according to CMR phenotype.

| Variable                  | NF-AC vs BVF   | NF-AC vs RVF     | NF-AC vs NF-LC | NF-AC vs NF-SC | BVF vs RVF       | BVF vs NF-LC   | BVF vs NF-SC   | RVF vs NF-LC   | RVF vs NF-SC   | NF-LC vs NF-SC |
|---------------------------|----------------|------------------|----------------|----------------|------------------|----------------|----------------|----------------|----------------|----------------|
| <b>CMR indication</b>     |                |                  |                |                |                  |                |                |                |                |                |
| Myocardial ischaemia      | 1.0            | 1.0              | 1.0            | 1.0            | 0.97             | 0.97           | 0.97           | 1.0            | 1.0            | 1.0            |
| Known / suspected PH      | <b>0.0049</b>  | 0.12             | 1.0            | 1.0            | <b>0.0011</b>    | <b>0.0069</b>  | <b>0.0069</b>  | 0.19           | 0.16           | 1.0            |
| Tissue characterisation   | <b>0.030</b>   | <b>&lt;0.001</b> | 0.19           | 0.10           | <b>&lt;0.001</b> | <b>0.012</b>   | <b>0.0048</b>  | <b>0.014</b>   | <b>0.027</b>   | 0.83           |
| Volumes / function / mass | 1.0            | 1.0              | 1.0            | 1.0            | 1.0              | 1.0            | 1.0            | 1.0            | 1.0            | 1.0            |
| <b>CMR metrics</b>        |                |                  |                |                |                  |                |                |                |                |                |
| RVEDVi                    | <b>6.1e-05</b> | <b>4.0e-11</b>   | <b>3.8e-14</b> | <b>5.4e-13</b> | 0.97             | 0.72           | <b>3.1e-07</b> | 0.54           | <b>5.7e-12</b> | <b>9.6e-15</b> |
| RVESVi                    | <b>1.8e-08</b> | <b>3.8e-13</b>   | <b>1.7e-05</b> | <b>0.00035</b> | 0.88             | <b>3.3e-06</b> | <b>2.8e-08</b> | <b>1.8e-08</b> | <b>4.3e-12</b> | <b>5.9e-09</b> |
| RVSVi                     | 0.076          | <b>0.00090</b>   | <b>4.0e-17</b> | <b>4.3e-16</b> | 0.69             | <b>1.8e-07</b> | 0.076          | <b>2.2e-13</b> | <b>0.034</b>   | <b>1.2e-15</b> |
| RVEF                      | <b>6.7e-09</b> | <b>1.9e-13</b>   | 0.78           | 0.60           | 0.77             | <b>9.6e-08</b> | <b>3.6e-08</b> | <b>1.6e-10</b> | <b>3.4e-11</b> | 0.58           |
| RV MVR                    | <b>0.026</b>   | <b>1.4e-05</b>   | 0.59           | <b>0.038</b>   | <b>6.5e-05</b>   | 0.15           | <b>0.0053</b>  | <b>4.3e-05</b> | <b>0.0053</b>  | <b>0.038</b>   |
| RAi area                  | 0.20           | <b>4.6e-07</b>   | <b>4.6e-07</b> | <b>3.8e-05</b> | <b>0.0074</b>    | 0.058          | <b>0.0021</b>  | 0.19           | <b>2.0e-08</b> | <b>1.1e-10</b> |
| LVEDVi                    | <b>1.8e-09</b> | <b>4.7e-05</b>   | <b>1.3e-11</b> | <b>5.5e-15</b> | <b>1.1e-10</b>   | <b>3.7e-07</b> | <b>1.8e-08</b> | <b>1.0e-10</b> | 0.89           | <b>5.5e-15</b> |
| LVESVi                    | <b>3.7e-09</b> | 0.55             | <b>0.048</b>   | <b>1.6e-06</b> | <b>2.8e-10</b>   | <b>6.2e-12</b> | <b>3.2e-08</b> | 0.14           | <b>0.035</b>   | <b>1.5e-06</b> |
| LVSVi                     | <b>0.024</b>   | <b>4.8e-09</b>   | <b>5.2e-16</b> | <b>5.2e-16</b> | 0.057            | <b>4.2e-09</b> | 0.14           | <b>3.5e-14</b> | 0.068          | <b>1.7e-15</b> |
| LVEF                      | <b>1.6e-08</b> | <b>0.015</b>     | 0.24           | 0.40           | <b>1.6e-05</b>   | <b>1.2e-07</b> | <b>6.2e-08</b> | <b>0.0078</b>  | <b>0.0078</b>  | 0.73           |
| LV MVR                    | 0.051          | <b>4.9e-05</b>   | 0.67           | <b>3.8e-09</b> | <b>0.0010</b>    | 0.067          | <b>9.3e-05</b> | <b>0.0014</b>  | 0.33           | <b>1.5e-05</b> |
| LAi area                  | 0.80           | <b>1.5e-05</b>   | <b>1.5e-05</b> | <b>1.2e-06</b> | <b>0.0011</b>    | <b>0.019</b>   | <b>0.0049</b>  | <b>2.3e-09</b> | 0.26           | <b>5.1e-10</b> |
| COi                       | 0.54           | <b>6.9e-05</b>   | <b>8.6e-06</b> | <b>0.015</b>   | 0.064            | <b>0.0025</b>  | 0.54           | <b>2.5e-07</b> | <b>0.011</b>   | <b>1.6e-07</b> |
| T1                        | 0.30           | <b>4.4e-05</b>   | <b>0.0047</b>  | 0.066          | <b>0.042</b>     | 0.30           | 0.080          | 0.080          | <b>4.4e-05</b> | <b>0.00051</b> |
| T2                        | <b>0.038</b>   | <b>0.0019</b>    | <b>2.0e-05</b> | <b>4.3e-06</b> | <b>0.0014</b>    | <b>0.00018</b> | 0.98           | 0.57           | <b>2.6e-06</b> | <b>1.3e-07</b> |
| ECV                       | 0.20           | <b>0.019</b>     | <b>0.032</b>   | <b>0.0031</b>  | <b>0.013</b>     | <b>0.018</b>   | 0.46           | 0.50           | <b>0.00027</b> | <b>0.00027</b> |

|                               |               |                |              |                |                |               |               |                |                |                |
|-------------------------------|---------------|----------------|--------------|----------------|----------------|---------------|---------------|----------------|----------------|----------------|
| Major insertion point LGE     | 0.85          | <b>7.8e-11</b> | 0.85         | 0.58           | <b>0.00081</b> | 0.85          | 1.0           | <b>3.9e-07</b> | <b>7.1e-07</b> | 0.85           |
| Major non-insertion point LGE | <b>0.0012</b> | 0.74           | 0.82         | 0.82           | <b>0.0012</b>  | <b>0.0041</b> | <b>0.0012</b> | 0.77           | 0.82           | 0.82           |
| Pericardial effusion          | 0.81          | <b>0.00046</b> | <b>0.018</b> | 0.81           | 0.091          | 0.31          | 1.0           | 0.31           | <b>0.0062</b>  | 0.091          |
| Heart rate                    | 0.25          | <b>0.0092</b>  | 0.25         | <b>5.9e-05</b> | 0.56           | 0.15          | 0.38          | <b>0.0092</b>  | 0.51           | <b>0.00042</b> |

Bold denotes statistically significant values ( $P < 0.05$ ).

CMR, cardiovascular magnetic resonance; CO, cardiac output; ECV, extracellular volume; EDV, end-diastolic volume; EF, ejection fraction; ESV, end-systolic volume; i, indexed for body-surface area; LA, left atrial; LGE, late gadolinium enhancement; LV, left ventricular; MVR, mass-to-volume ratio; RA, right atrial; RV, right ventricular; SV, stroke volume.

**Supplementary Table 9:** Haemodynamics and demographics in CMR phenotypes (post hoc *P*-values detailed in supplementary table 10).

| Variable                                                                  | NF-AC<br>(n=128)  | BVF<br>(n= 14)    | RVF<br>(n= 27)    | NF-LC<br>(n= 40)  | NF-SC<br>(n= 51)  | <i>P</i> -value  |
|---------------------------------------------------------------------------|-------------------|-------------------|-------------------|-------------------|-------------------|------------------|
| <b>PH details (haemodynamic data from RHC within 1 year of CMR study)</b> |                   |                   |                   |                   |                   |                  |
| PH (%)                                                                    | 35                | 50                | 92                | 42                | 33                | <b>&lt;0.001</b> |
| PH Group, n<br>(Group<br>1/2/3/4)                                         | 30/12/4/0         | 1/5/0/1           | 20/2/3/0          | 14/3/0/0          | 13/2/1/1          | -                |
| mPAP<br>(mmHg) all<br>patients                                            | 23 (11-56)        | 24 (15-35)        | 47 (17-<br>69)    | 22 (12-<br>61)    | 25 (12-57)        | <b>&lt;0.001</b> |
| mPAP<br>(mmHg) PH<br>patients                                             | 30 (22-56)        | 27 (27-35)        | 51 (25-<br>69)    | 33 (20-<br>61)    | 31 (19-57)        | <b>&lt;0.001</b> |
| RAP (mmHg)<br>all patients                                                | 6 (0-15)          | 8 (4-21)          | 10 (3-30)         | 6 (1-17)          | 5 (1-11)          | <b>&lt;0.001</b> |
| RAP (mmHg)<br>PH patients                                                 | 8 (0-12)          | 14 (8-21)         | 10 (3-30)         | 6 (3-17)          | 5 (1-11)          | <b>0.0073</b>    |
| PCWP<br>(mmHg) all<br>patients                                            | 11 (4-22)         | 13 (9-20)         | 11 (5-16)         | 10 (5-16)         | 9 (4-18)          | 0.73             |
| PCWP<br>(mmHg) PH<br>patients                                             | 13 (5-22)         | 20 (14-20)        | 11 (5-16)         | 10 (6-16)         | 11 (5-18)         | <b>0.0091</b>    |
| PH targeted<br>therapies                                                  | 37                | 21                | 55                | 55                | 35                | 0.061            |
| <b>Patient demographics and clinical details</b>                          |                   |                   |                   |                   |                   |                  |
| Height (m)                                                                | 1.6 (1.5-<br>1.9) | 1.7 (1.4-<br>1.9) | 1.6 (1.5-<br>1.8) | 1.7 (1.4-<br>1.9) | 1.6 (1.5-<br>1.9) | <b>0.0024</b>    |
| Weight (kg)                                                               | 63 (39-<br>123)   | 68 (40-89)        | 66 (45-<br>110)   | 66 (42-<br>102)   | 65 (43-97)        | 0.99             |
| Age (years)                                                               | 58 (21-85)        | 55 (31-77)        | 60 (25-<br>79)    | 58 (21-<br>78)    | 64 (17-78)        | 0.64             |
| Sex (female,<br>%)                                                        | 17                | 50                | 18                | 32                | 11                | <b>0.0091</b>    |

Values are median (range) or n (%). Bold denotes statistically significant values ( $P < 0.05$ ). CMR, cardiovascular magnetic resonance; kg, kilogrammes; m, metres; mmHg, millimetre of mercury; mPAP, mean pulmonary arterial pressure; PCWP, pulmonary capillary wedge pressure; PH, pulmonary hypertension; RAP, right atrial pressure; RHC, right heart catheter.



**Supplementary Table 10:** Post hoc *P*-values for details of haemodynamics and demographics according to CMR phenotype.

| Variable                                                                  | NF-AC vs BVF | NF-AC vs RVF   | NF-AC vs NF-LC | NF-AC vs NF-SC | BVF vs RVF    | BVF vs NF-LC | BVF vs NF-SC | RVF vs NF-LC   | RVF vs NF-SC   | NF-LC vs NF-SC |
|---------------------------------------------------------------------------|--------------|----------------|----------------|----------------|---------------|--------------|--------------|----------------|----------------|----------------|
| <b>PH details (haemodynamic data from RHC within 1 year of CMR study)</b> |              |                |                |                |               |              |              |                |                |                |
| PH                                                                        | 0.56         | <b>3.8e-07</b> | 0.58           | 0.86           | <b>0.0092</b> | 0.84         | 0.56         | <b>8.4e-05</b> | <b>1.4e-06</b> | 0.56           |
| mPAP all patients                                                         | 0.99         | <b>1.1e-07</b> | 0.91           | 0.69           | <b>0.014</b>  | 0.91         | 0.87         | <b>9.5e-05</b> | <b>7.5e-05</b> | 0.91           |
| RAP all patients                                                          | 0.12         | <b>0.0075</b>  | 0.78           | <b>0.023</b>   | 0.96          | 0.12         | <b>0.023</b> | <b>0.023</b>   | <b>0.00063</b> | 0.12           |
| PCWP all patients                                                         | 0.20         | 0.59           | 0.29           | 0.17           | 0.17          | 0.16         | 0.16         | 0.59           | 0.41           | 0.66           |
| PH targeted therapies                                                     | 0.54         | 0.16           | 0.16           | 0.96           | 0.16          | 0.16         | 0.65         | 1.0            | 0.16           | 0.16           |
| <b>Patient demographics and clinical details</b>                          |              |                |                |                |               |              |              |                |                |                |
| Height                                                                    | <b>0.040</b> | 0.32           | 0.074          | 0.090          | <b>0.040</b>  | 0.48         | <b>0.020</b> | 0.090          | 0.90           | <b>0.026</b>   |
| Weight                                                                    | 0.96         | 0.96           | 0.96           | 0.96           | 0.96          | 0.96         | 0.96         | 0.96           | 0.96           | 0.96           |
| Age                                                                       | 0.71         | 0.91           | 0.91           | 0.71           | 0.71          | 0.71         | 0.71         | 0.91           | 0.73           | 0.71           |
| Sex                                                                       | <b>0.045</b> | 0.79           | 0.11           | 0.55           | 0.14          | 0.48         | <b>0.042</b> | 0.44           | 0.55           | 0.067          |

Bold denotes statistically significant values ( $P < 0.05$ ).

CMR, cardiovascular magnetic resonance; mPAP, mean pulmonary arterial pressure; PCWP, pulmonary capillary wedge pressure; PH, pulmonary hypertension; RAP, right atrial pressure; RHC, right heart catheter.

**Supplementary Table 11:** Clinical details and auto-antibody profiles of CMR phenotypes (post hoc *P*-values detailed in supplementary table 12).

| Variable                       | NF-AC<br>(n=128) | BVF<br>(n= 14) | RVF<br>(n= 27) | NF-LC<br>(n= 40) | NF-SC<br>(n= 51) | <i>P</i> -value  |
|--------------------------------|------------------|----------------|----------------|------------------|------------------|------------------|
| <b>Clinical details</b>        |                  |                |                |                  |                  |                  |
| Limited (%)                    | 65               | 42             | 59             | 67               | 66               | 0.50             |
| Diffuse (%)                    | 34               | 57             | 37             | 32               | 31               | 0.50             |
| Overlap syndrome (%)           | 32               | 42             | 29             | 27               | 25               | 0.75             |
| Inflammatory arthritis (%)     | 10               | 7              | 3              | 10               | 7                | 0.93             |
| Sjögren's syndrome (%)         | 7                | 0              | 7              | 5                | 7                | 0.94             |
| SLE (%)                        | 5                | 7              | 3              | 7                | 1                | 0.66             |
| Myositis (%)                   | 16               | 35             | 18             | 12               | 15               | 0.41             |
| Disease duration (years)       | 7 (0-47)         | 12 (2-29)      | 8 (0-26)       | 12 (0-45)        | 11 (0-36)        | 0.35             |
| Disease severity score         | 2.0 (1.0-4.0)    | 3.0 (2.0-4.0)  | 3.0 (2.0-4.0)  | 3.0 (1.0-4.0)    | 2.0 (1.0-4.0)    | <b>&lt;0.001</b> |
| Immunomodulatory therapies (%) | 69               | 85             | 53             | 62               | 60               | 0.22             |
| History of IHD (%)             | 7                | 14             | 14             | 15               | 5                | 0.26             |
| <b>Autoantibody subset, %</b>  |                  |                |                |                  |                  |                  |
| Anticentromere                 | 37               | 0              | 23             | 40               | 36               | <b>0.020</b>     |
| Anti-topoisomerase I           | 21               | 21             | 19             | 17               | 26               | 0.89             |
| Anti-RNA polymerase            | 7                | 7              | 11             | 10               | 6                | 0.90             |
| Anti-U3 RNP                    | 6                | 14             | 3              | 12               | 4                | 0.35             |
| Anti-PM/Scl                    | 5                | 0              | 3              | 2                | 4                | 0.98             |
| Other*                         | 8                | 14             | 19             | 7                | 8                | 0.43             |
| ANA+ENA-                       | 33               | 35             | 26             | 37               | 34               | 0.94             |
| ANA-                           | 6                | 8              | 4              | 0                | 9                | 0.39             |

\* Includes anti-U1 RNP, anti-Th/To, anti-Ku, anti-Jo-1, anti-PL-7, anti-PL-12, anti-SRP1, and anti-TIF1G.

Values are median (range) or n (%). Bold denotes statistically significant values ( $P < 0.05$ ). ANA, antinuclear antibody; CMR, cardiovascular magnetic resonance; ENA, anti-extractable nuclear antigen; IHD, ischaemic heart disease; SLE, systemic lupus erythematosus; SSc, systemic sclerosis/scleroderma.

**Supplementary Table 12:** Post hoc *P*-values for SSc details and auto-antibody profiles according to CMR phenotype.

| Variable                   | NF-AC vs BVF  | NF-AC vs RVF   | NF-AC vs NF-LC | NF-AC vs NF-SC | BVF vs RVF | BVF vs NF-LC | BVF vs NF-SC  | RVF vs NF-LC | RVF vs NF-SC   | NF-LC vs NF-SC |
|----------------------------|---------------|----------------|----------------|----------------|------------|--------------|---------------|--------------|----------------|----------------|
| <b>SSc details</b>         |               |                |                |                |            |              |               |              |                |                |
| Limited                    | 0.48          | 0.94           | 0.96           | 0.96           | 0.86       | 0.48         | 0.48          | 0.94         | 0.94           | 1.00           |
| Diffuse                    | 0.47          | 1.0            | 1.0            | 1.0            | 0.80       | 0.47         | 0.47          | 1.0          | 1.0            | 1.0            |
| Overlap syndrome           | 1.0           | 1.0            | 1.0            | 1.0            | 1.0        | 1.0          | 1.0           | 1.0          | 1.0            | 1.0            |
| Inflammatory arthritis     | 1.0           | 1.0            | 1.0            | 1.0            | 1.0        | 1.0          | 1.0           | 1.0          | 1.0            | 1.0            |
| Sjögren's syndrome         | 1.0           | 1.0            | 1.0            | 1.0            | 1.0        | 1.0          | 1.0           | 1.0          | 1.0            | 1.0            |
| SLE                        | 1.0           | 1.0            | 1.0            | 1.0            | 1.0        | 1.0          | 1.0           | 1.0          | 1.0            | 1.0            |
| Myositis                   | 0.45          | 0.87           | 0.87           | 1.0            | 0.67       | 0.45         | 0.45          | 0.87         | 0.87           | 0.87           |
| Disease duration           | 0.57          | 0.70           | 0.57           | 0.57           | 0.57       | 0.98         | 0.98          | 0.57         | 0.57           | 0.98           |
| Disease severity score     | <b>0.0040</b> | <b>0.00030</b> | <b>0.017</b>   | 0.23           | 0.90       | 0.23         | <b>0.0066</b> | 0.15         | <b>0.00086</b> | <b>0.016</b>   |
| Immunomodulatory therapies | 0.59          | 0.45           | 0.63           | 0.58           | 0.45       | 0.45         | 0.45          | 0.70         | 0.70           | 0.83           |
| History of IHD             | 0.49          | 0.49           | 0.49           | 1.0            | 1.0        | 1.0          | 0.49          | 1.0          | 0.49           | 0.49           |
| <b>Autoantibody subset</b> |               |                |                |                |            |              |               |              |                |                |
| Anticentromere             | <b>0.021</b>  | 0.31           | 0.95           | 1.00           | 0.19       | <b>0.021</b> | <b>0.021</b>  | 0.31         | 0.43           | 0.95           |
| Anti-topoisomerase I       | 1.0           | 1.0            | 1.0            | 1.0            | 1.0        | 1.0          | 1.0           | 1.0          | 1.0            | 1.0            |
| Anti-RNA polymerase        | 1.0           | 1.0            | 1.0            | 1.0            | 1.0        | 1.0          | 1.0           | 1.0          | 1.0            | 1.0            |
| Anti-U3 RNP                | 0.55          | 1.0            | 0.55           | 1.0            | 0.55       | 1.0          | 0.55          | 0.65         | 1.0            | 0.55           |
| Anti-PM/Scl                | 1.0           | 1.0            | 1.0            | 1.0            | 1.0        | 1.0          | 1.0           | 1.0          | 1.0            | 1.0            |
| Other*                     | 1.0           | 0.87           | 1.0            | 1.0            | 1.0        | 1.0          | 1.0           | 0.87         | 0.87           | 1.0            |
| ANA+ENA-                   | 1.0           | 1.0            | 1.0            | 1.0            | 1.0        | 1.0          | 1.0           | 1.0          | 1.0            | 1.0            |
| ANA-                       | 0.93          | 1.0            | 0.86           | 0.93           | 1.0        | 0.86         | 1.0           | 0.93         | 0.93           | 0.86           |

\* Includes anti-U1 RNP, anti-Th/To, anti-Ku, anti-Jo-1, anti-PL-7, anti-PL-12, anti-SRP1, and anti-TIF1G.

Bold denotes statistically significant values ( $P < 0.05$ ).

ANA, antinuclear antibody; CMR, cardiovascular magnetic resonance; ENA, anti-extractable nuclear antigen; IHD, ischaemic heart disease; SLE, systemic lupus erythematosus; SSc, systemic sclerosis/scleroderma.

**Supplementary Figure 1:** Kaplan-Meier curves for all-cause mortality stratified by: (A) presence or absence of SSc-associated PH; (B) limited versus diffuse cutaneous SSc; (C) presence or absence of overlap syndrome.

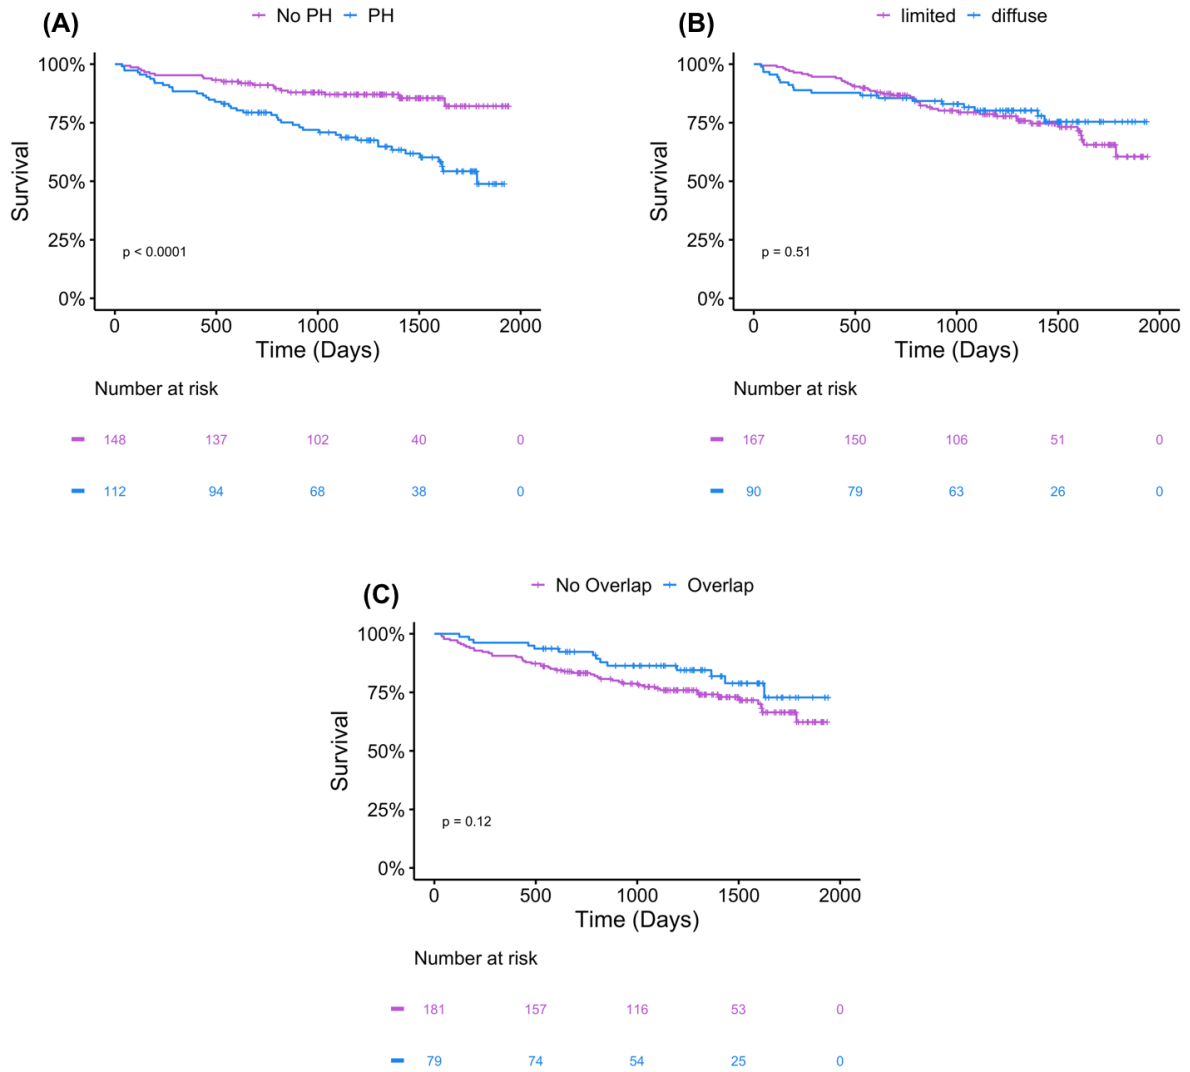

Statistically significant values:  $P < 0.05$ .

**Supplementary Figure 2:** Forest plot summarising simple Cox regression analysis of the association between CMR variables and all-cause mortality.

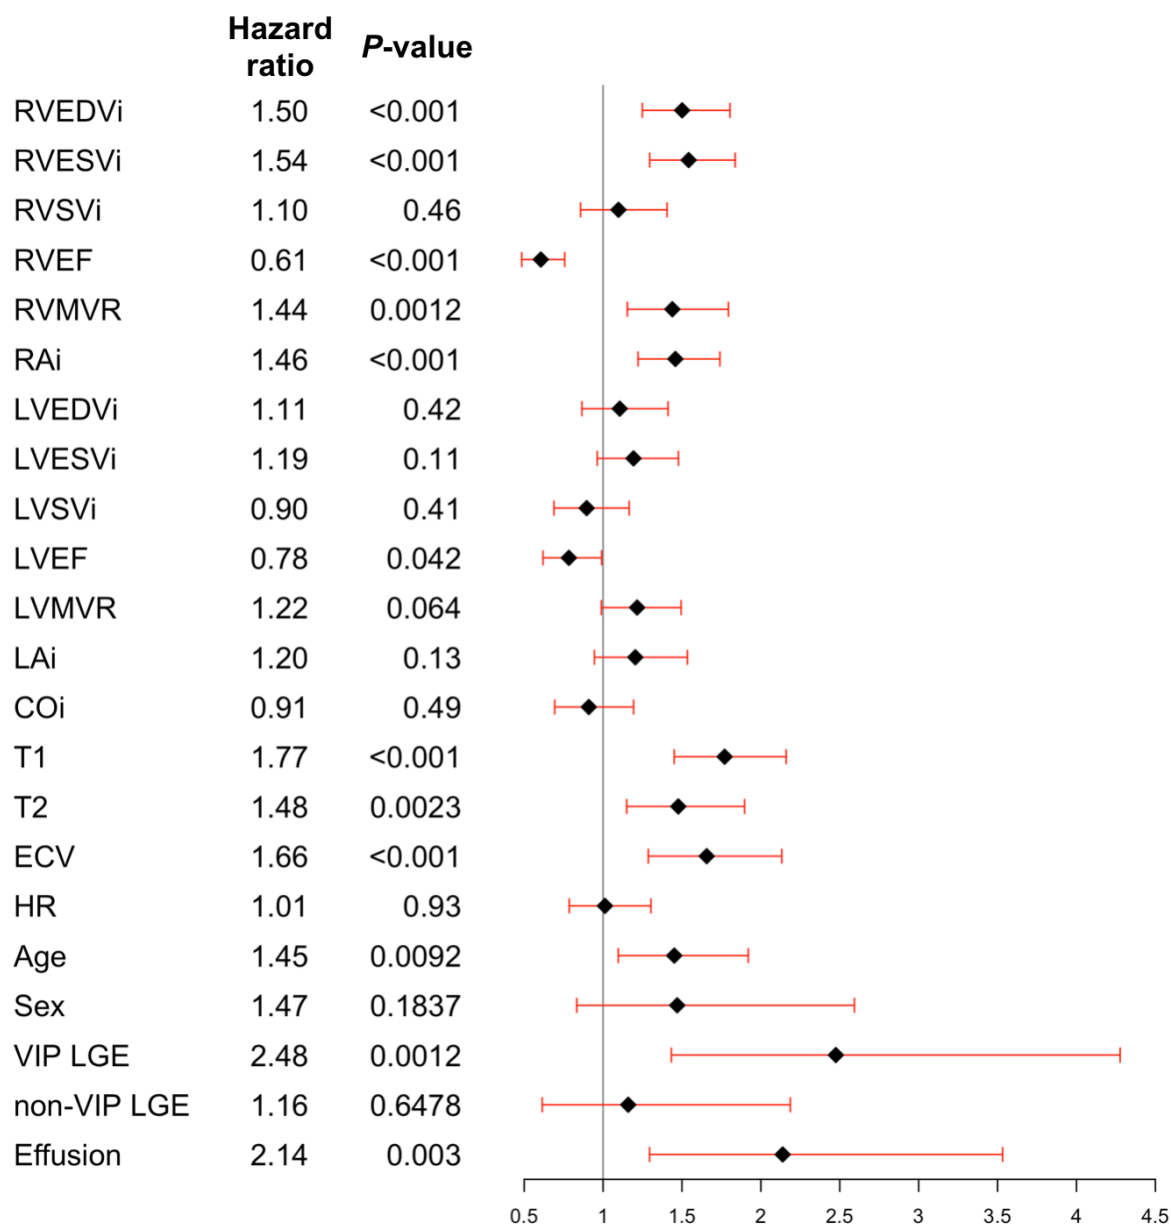

bpm, beats per minute; CO, cardiac output; ECV, extracellular volume; EDV, end-diastolic volume; EF, ejection fraction; ESV, end-systolic function; HR, hazard ratio; i, indexed for body-surface area; LA, left atrial; LGE, late gadolinium enhancement; LV, left ventricular; M, mass; RA, right atrial; RV, right ventricular; SV, stroke volume; VIP, ventricular insertion point.

Hazard ratios are reported per standard deviation change in metric for continuous data. Statistically significant values:  $P < 0.05$ .
